# Supplementary material
Source: MDPI journal article supplement (https://www.mdpi.com/2227-9040/9/7/172)
Supplement: s1 [file s1]

# Expediting Disulfiram Assays through a Systematic Analytical Quality by Design Approach

João Basso, M. Luísa Ramos, Alberto Pais, Rui Vitorino, Ana Fortuna and Carla Vitorino

## Supplementary Material

### Cu(DDC)<sub>2</sub> structural analysis: <sup>1</sup>H and <sup>13</sup>C RMN

The complex is paramagnetic and, because of the rapid nuclear relaxation induced by the paramagnetic properties of the Cu (II) metal ion, <sup>1</sup>H NMR signals of bound ligands (inner sphere) are broadened and/or shifted (to lower frequencies) (**Figure S1**). The large shifts and linewidths observed for the signals from the <sup>1</sup>H nuclei of CH<sub>2</sub> and CH<sub>3</sub> suggest that the ligand is coordinated to the metal ion by the S atoms of the CS<sub>2</sub> group; the complex is assumed to have a metal:ligand stoichiometry of 1:2. Accordingly, the <sup>13</sup>C NMR signals of the ligands in the complex are not detected, probably because of severe broadening (**Figure S2**). Shifts, as a result of ligand binding to paramagnetic metals, may come either from through-space dipolar interactions (pseudo-contact), or from direct delocalization of unpaired electron spin-density from the metal (contact shift). The Cu (II) (3d<sup>9</sup>) metal ion in the complex will have both contact shift and pseudo-contact shift contributions, resulting in very broad signals for mononuclear complexes. In contrast, binuclear copper (II) complexes show relatively sharp NMR line widths which are two orders of magnitude narrower than the mononuclear analogues. The observed broad signals support the hypothesis that the copper (II)/ligand complex is a mononuclear CuL<sub>2</sub> species.

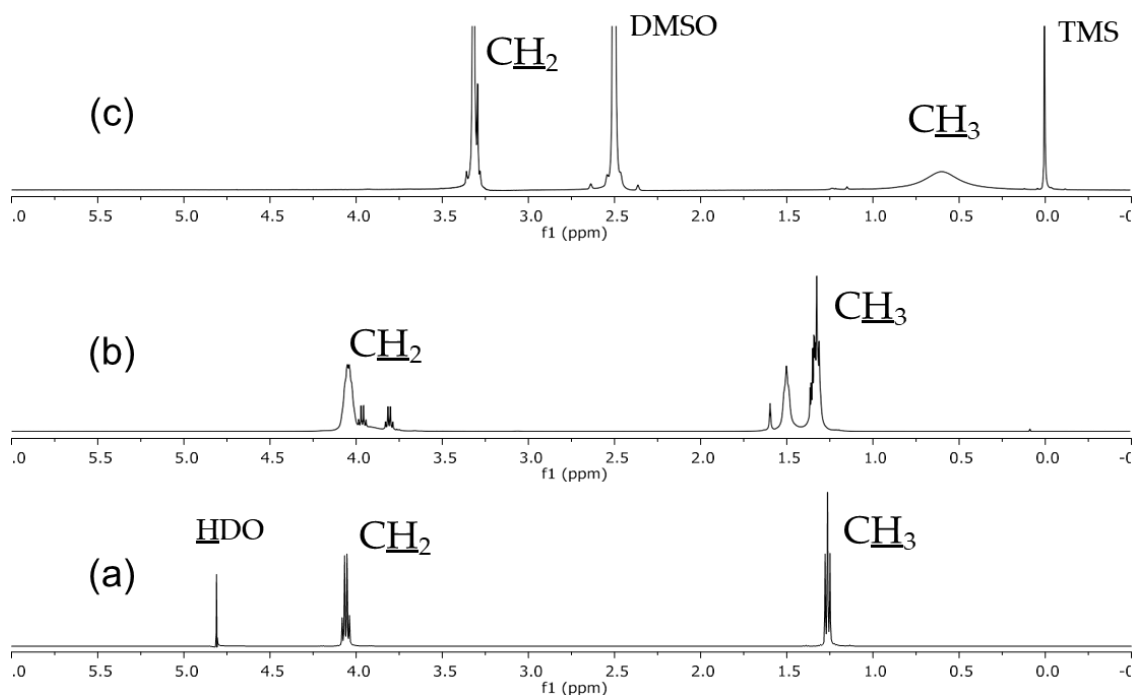

**Figure S1.** <sup>1</sup>H NMR spectra of (a) sodium diethyldithiocarbamate trihydrate in D<sub>2</sub>O, (b) disulfiram in CDCl<sub>3</sub> and (c) copper (II) diethyldithiocarbamate in DMSO.

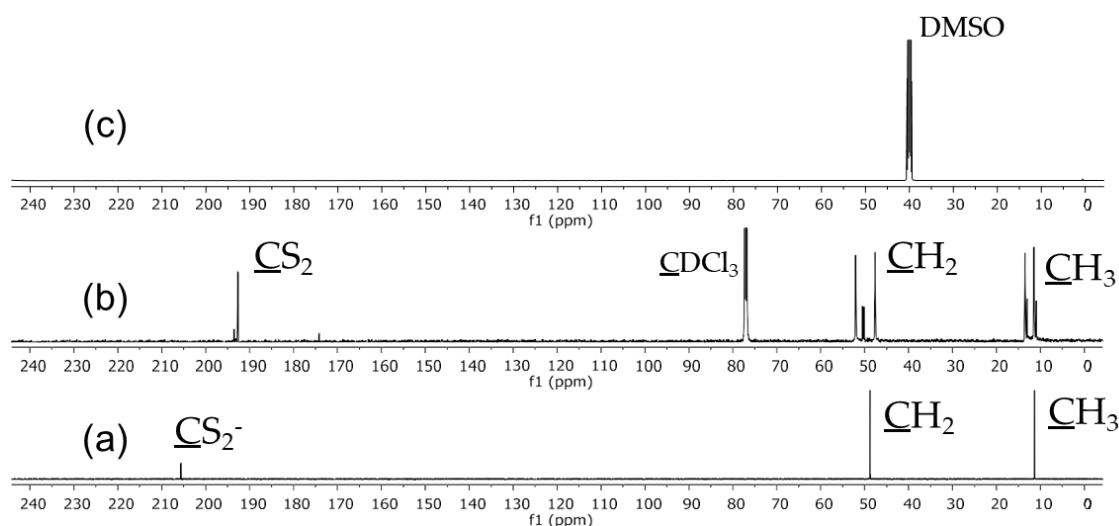

**Figure S2.**  $^{13}\text{C}$  NMR spectra of (a) sodium diethyldithiocarbamate trihydrate in  $\text{D}_2\text{O}$ , (b) disulfiram in  $\text{CDCl}_3$  and (c) copper (II) diethyldithiocarbamate in DMSO.

**Table S1.** ANOVA parameters for the characterization of the model fitting per CAA.

| Number of Theoretical Plates (DSF)                         |    |                |                |                    |
|------------------------------------------------------------|----|----------------|----------------|--------------------|
| Source                                                     | DF | Sum of Squares | Mean Square    | F Ratio            |
| Model                                                      | 3  | 97665849       | 32555283       | 82.5452            |
| Error                                                      | 14 | 5521510        | 394393.58      | <b>Prob &gt; F</b> |
| C. Total                                                   | 17 | 103187360      |                | <.0001*            |
| Lack Of Fit                                                | 5  | 1706131.7      | 341226         | 0.8049             |
| Pure Error                                                 | 9  | 3815378.5      | 423931         | <b>Prob &gt; F</b> |
| Total Error                                                | 14 | 5521510.2      |                | 0.5737             |
|                                                            |    |                | <b>Max RSq</b> |                    |
|                                                            |    |                | 0.9630         |                    |
| Number of Theoretical Plates ( $\text{Cu}(\text{DDC})_2$ ) |    |                |                |                    |
| Source                                                     | DF | Sum of Squares | Mean Square    | F Ratio            |
| Model                                                      | 2  | 157315566      | 78657783       | 69.8542            |
| Error                                                      | 15 | 16890414       | 1126027.6      | <b>Prob &gt; F</b> |
| C. Total                                                   | 17 | 174205980      |                | <.0001*            |
| Lack Of Fit                                                | 6  | 5364563        | 894094         | 0.6982             |
| Pure Error                                                 | 9  | 11525851       | 1280650        | <b>Prob &gt; F</b> |
| Total Error                                                | 15 | 16890414       |                | 0.6587             |
|                                                            |    |                | <b>Max RSq</b> |                    |
|                                                            |    |                | 0.9338         |                    |
| Tailing Factor (DSF)                                       |    |                |                |                    |
| Source                                                     | DF | Sum of Squares | Mean Square    | F Ratio            |
| Model                                                      | 3  | 0.15183087     | 0.050610       | 1070.915           |
| Error                                                      | 14 | 0.00066163     | 0.000047       | <b>Prob &gt; F</b> |
| C. Total                                                   | 17 | 0.15249250     |                | <.0001*            |
| Lack Of Fit                                                | 5  | 0.00020413     | 0.000041       | 0.8031             |
| Pure Error                                                 | 9  | 0.00045750     | 0.000051       | <b>Prob &gt; F</b> |
| Total Error                                                | 14 | 0.00066163     |                | 0.5748             |
|                                                            |    |                | <b>Max RSq</b> |                    |
|                                                            |    |                | 0.9970         |                    |
| Tailing Factor ( $\text{Cu}(\text{DDC})_2$ )               |    |                |                |                    |

| Source                                  | DF | Sum of Squares | Mean Square | F Ratio            |
|-----------------------------------------|----|----------------|-------------|--------------------|
| Model                                   | 1  | 0.19253333     | 0.192533    | 61.3924            |
| Error                                   | 16 | 0.05017778     | 0.003136    | <b>Prob &gt; F</b> |
| C. Total                                | 17 | 0.24271111     |             | <.0001*            |
| Lack Of Fit                             | 1  | 0.00694444     | 0.006944    | 2.4094             |
| Pure Error                              | 15 | 0.04323333     | 0.002882    | <b>Prob &gt; F</b> |
| Total Error                             | 16 | 0.05017778     |             | 0.1414             |
|                                         |    |                |             | <b>Max RSq</b>     |
|                                         |    |                |             | 0.8219             |
| Resolution                              |    |                |             |                    |
| Source                                  | DF | Sum of Squares | Mean Square | F Ratio            |
| Model                                   | 4  | 197.44111      | 49.3603     | 38501.02           |
| Error                                   | 13 | 0.01667        | 0.0013      | <b>Prob &gt; F</b> |
| C. Total                                | 17 | 197.45778      |             | <.0001*            |
| Lack Of Fit                             | 4  | 0.01666667     | 0.004167    | .                  |
| Pure Error                              | 9  | 0.00000000     | 0.000000    | <b>Prob &gt; F</b> |
| Total Error                             | 13 | 0.01666667     |             | .                  |
|                                         |    |                |             | <b>Max RSq</b>     |
|                                         |    |                |             | 1.0000             |
| Retention Time (DSF)                    |    |                |             |                    |
| Source                                  | DF | Sum of Squares | Mean Square | F Ratio            |
| Model                                   | 4  | 128.21791      | 32.0545     | 881.0985           |
| Error                                   | 13 | 0.47294        | 0.0364      | <b>Prob &gt; F</b> |
| C. Total                                | 17 | 128.69085      |             | <.0001*            |
| Lack Of Fit                             | 4  | 0.45179167     | 0.112948    | 48.0629            |
| Pure Error                              | 9  | 0.02115000     | 0.002350    | <b>Prob &gt; F</b> |
| Total Error                             | 13 | 0.47294167     |             | <.0001*            |
|                                         |    |                |             | <b>Max RSq</b>     |
|                                         |    |                |             | 0.9998             |
| Retention Time (Cu(DDC) <sub>2</sub> )  |    |                |             |                    |
| Source                                  | DF | Sum of Squares | Mean Square | F Ratio            |
| Model                                   | 4  | 1062.3752      | 265.594     | 918.0852           |
| Error                                   | 13 | 3.7608         | 0.289       | <b>Prob &gt; F</b> |
| C. Total                                | 17 | 1066.1360      |             | <.0001*            |
| Lack Of Fit                             | 4  | 3.7544833      | 0.938621    | 1340.887           |
| Pure Error                              | 9  | 0.0063000      | 0.000700    | <b>Prob &gt; F</b> |
| Total Error                             | 13 | 3.7607833      |             | <.0001*            |
|                                         |    |                |             | <b>Max RSq</b>     |
|                                         |    |                |             | 1.0000             |
| Capacity Factor (DSF)                   |    |                |             |                    |
| Source                                  | DF | Sum of Squares | Mean Square | F Ratio            |
| Model                                   | 2  | 99.595211      | 49.7976     | 2083.679           |
| Error                                   | 15 | 0.358483       | 0.0239      | <b>Prob &gt; F</b> |
| C. Total                                | 17 | 99.953694      |             | <.0001*            |
| Capacity Factor (Cu(DDC) <sub>2</sub> ) |    |                |             |                    |
| Source                                  | DF | Sum of Squares | Mean Square | F Ratio            |
| Model                                   | 2  | 867.52943      | 433.765     | 2486.454           |
| Error                                   | 15 | 2.61677        | 0.174       | <b>Prob &gt; F</b> |
| C. Total                                | 17 | 870.14620      |             | <.0001*            |
